# Supplementary material
Source: publisher figshare collection journal article supplement (https://tandf.figshare.com/articles/dataset/_/8244554)
Supplement: Supplementary file 1 [file 2]

**Figure S1.** Schematic diagram of lag time and its components.

**Supplementary files:**

**Table S1.** Comparison of clinical characteristics of included and excluded subjects

|                                   | Included<br>(n = 138) | Excluded<br>(n = 45) | <i>P</i> |
|-----------------------------------|-----------------------|----------------------|----------|
| Sex (n, %)                        |                       |                      |          |
| Male                              | 71 (51.4%)            | 26 (57.8%)           | 0.571‡   |
| Female                            | 67 (48.6%)            | 19 (42.2%)           |          |
| Age at enucleation (mos)          | 29.4 ± 15.5           | 28.4 ± 20.6          | 0.766*   |
| Ethnicity (n, %)                  |                       |                      |          |
| Han                               | 118 (85.5%)           | 45 (100%)            | 0.004†   |
| Ethnical minorities               | 20 (14.5%)            | 0                    |          |
| Histopathologic risk level (n, %) |                       |                      |          |
| Standard                          | 78 (56.5%)            | 32 (71.1%)           | 0.119†   |
| High                              | 60 (43.5%)            | 13 (28.9%)           |          |

‡*Chi*-square test. \*Student's *t* test. †Fisher's exact probability test.

**Table S2.** Characteristics of retinoblastoma children with overall lag time longer than one year

| ID   | Sex | Age (mos) at |             | Presenting symptom | Ethnicity | Medical Insurance Coverage | Birth Place | Left behind | Lag time (days) |       |       |         | Histopathology |
|------|-----|--------------|-------------|--------------------|-----------|----------------------------|-------------|-------------|-----------------|-------|-------|---------|----------------|
|      |     | Diagnosis    | Enucleation |                    |           |                            |             |             | Lag 1           | Lag 2 | Lag 3 | Overall |                |
| 1053 | F   | 15.9         | 16.3        | Others             | Han       | Yes                        | Urban       | No          | 367             | 0     | 13    | 380     | SR             |
| 1061 | M   | 51.9         | 52.3        | Others             | Others    | Yes                        | Urban       | Yes         | 365             | 435   | 10    | 810     | SR             |
| 1072 | M   | 66.8         | 77.3        | Others             | Han       | Yes                        | Urban       | No          | 0               | 124   | 321   | 445     | HR             |
| 1098 | F   | 16.1         | 28.4        | Leukocoria         | Han       | No                         | Rural       | Yes         | 107             | 0     | 374   | 481     | SR             |
| 1108 | F   | 21.1         | 42.7        | Leukocoria         | Han       | Yes                        | Rural       | No          | 303             | 0     | 658   | 961     | HR             |
| 1147 | F   | 6.3          | 17.2        | Leukocoria         | Han       | Yes                        | Urban       | No          | 30              | 6     | 332   | 368     | SR             |
| 1159 | F   | 24.1         | 24.6        | Leukocoria         | Han       | Yes                        | Rural       | No          | 550             | 0     | 17    | 567     | HR             |
| 1163 | F   | 7.3          | 20.6        | Leukocoria         | Han       | Yes                        | Rural       | Yes         | 92              | 0     | 403   | 495     | HR             |

F, female; M, male; SR, standard-risk; HR, high-risk;
